# Supplementary material for: Clopidogrel plus Aspirin Use is Associated with Worse Long-Term Outcomes, but Aspirin Use Alone is Safe in Patients with Vasospastic Angina: Results from the VA-Korea Registry, A Prospective Multi-Center Cohort
Source: PubMed Central journal article supplement (PMC6883054; doi:10.1038/s41598-019-54390-w), 2019-11-28

**Clopidogrel plus Aspirin Use is Associated with Worse Long-Term Outcomes, but Aspirin Use Alone is Safe in Patients with Vasospastic Angina: Results from the VA-Korea Registry, A Prospective Multi-Center Cohort.**

Seong-Sik Cho, MD<sup>a</sup>; Sang-Ho Jo, MD<sup>b\*</sup>; Seung Hwan Han, MD<sup>c</sup>; Kwan Yong Lee, MD<sup>d</sup>; Sung-Ho Her, MD<sup>e</sup>; Min-Ho Lee, MD<sup>f</sup>; Won-Woo Seo, MD<sup>g</sup>; Sung Eun Kim, MD<sup>g</sup>; Tae-Hyun Yang, MD<sup>h</sup>; Keun-Ho Park, MD<sup>i</sup>; Jung-Won Suh, MD<sup>j</sup>; Byoung-Kwon Lee, MD<sup>k</sup>; Seung-Woon, Rha, MD<sup>l</sup>; Hyeon-Cheol Gwon, MD<sup>m</sup>; Sang Hong Baek, MD<sup>n</sup>

<sup>a</sup>Department of Occupational and Environmental Medicine, College of Medicine, Dong-A University, Busan, Korea

<sup>b\*</sup>Division of Cardiology, Department of Internal Medicine, Hallym University Sacred Heart Hospital, Anyang-si, Gyeonggi-do, Korea

<sup>c</sup>Department of Cardiovascular Medicine, Gil Medical Center, Gachon University, Incheon,

<sup>d</sup> Department of Cardiovascular Medicine, Incheon St. Mary's Hospital, The Catholic University of Korea, Incheon, South Korea

<sup>e</sup>Department of Cardiovascular Medicine, Daejeon St. Mary's Hospital, The Catholic University of Korea, Daejeon, South Korea

<sup>f</sup>Department of Cardiovascular Medicine, Soonchunhyang Seoul Hospital, Seoul, South Korea

<sup>g</sup>Department of Cardiovascular Medicine Hallym University Kangdong Hospital, Seoul, South Korea

<sup>h</sup>Department of Cardiovascular Medicine, Busan Paik Hospital, Inje University, Busan, South Korea

<sup>i</sup>Department of Cardiovascular Medicine, Chosun Medical Center, Gwangju, South Korea

<sup>j</sup>Department of Cardiovascular Medicine, Bundang Hospital, Seoul National University,

Seongnam, South Korea

<sup>k</sup>Department of Cardiovascular Medicine, Gangnam Severance Hospital, Yonsei University,  
Seoul, South Korea

<sup>l</sup>Department of Cardiovascular Medicine, Guro Hospital, Korea University, Seoul, South  
Korea

<sup>m</sup>Department of Cardiovascular Medicine, Samsung Medical Center, Sungkyunkwan  
University, Seoul, South Korea

<sup>n</sup>Department of Cardiovascular Medicine, Seoul St. Mary's Hospital, The Catholic University  
of Korea, Seoul, South Korea

**Supplementary table 1. result of Cox proportional hazard regression for primary outcome additionally including atherosclerosis and troponin-I in the model (n=937)**

|                            | HR        | 95%CI |      | p     |
|----------------------------|-----------|-------|------|-------|
| Age                        | 1.00      | 0.98  | 1.02 | 0.928 |
| Female                     | 0.98      | 0.56  | 1.73 | 0.949 |
| History of CHD             | 1.04      | 0.53  | 2.04 | 0.918 |
| Smoking                    | 1.20      | 0.69  | 2.10 | 0.523 |
| Hypertension               | 0.86      | 0.50  | 1.48 | 0.583 |
| DM                         | 0.94      | 0.40  | 2.23 | 0.897 |
| Dyslipidemia               | 1.75      | 1.01  | 3.05 | 0.048 |
| Calcium Channel blocker    | 1.36      | 0.83  | 2.23 | 0.228 |
| Definite spasm             | 1.12      | 0.45  | 2.81 | 0.812 |
| Atherosclerosis $\geq$ 50% | 1.07      | 0.44  | 2.59 | 0.886 |
| Troponin-I                 | 1.03      | 1.00  | 1.06 | 0.077 |
| <b>Antiplatelet agents</b> |           |       |      |       |
| No antiplatelet agent      | reference |       |      |       |
| Aspirin                    | 0.83      | 0.48  | 1.45 | 0.514 |
| Clopidogrel                | 0.50      | 0.12  | 2.11 | 0.345 |
| Aspirin + clopidogrel      | 1.84      | 0.89  | 3.79 | 0.100 |

HR: Hazard ratio, CI: confidence interval, CHD: Coronary heart disease, DM: diabetes mellitus, primary outcome includes arrhythmia, acute coronary syndrome, and death

**Supplementary table 2. result of Cox proportional hazard regression for primary outcome additionally including atherosclerosis and troponin-I in the model among patients without history of PCI (n= 912)**

|                            | HR        | 95%CI |      | p     |
|----------------------------|-----------|-------|------|-------|
| Age                        | 0.99      | 0.97  | 1.02 | 0.636 |
| Female                     | 0.92      | 0.51  | 1.65 | 0.781 |
| History of CHD             | 0.80      | 0.34  | 1.89 | 0.610 |
| Smoking                    | 1.04      | 0.58  | 1.86 | 0.901 |
| Hypertension               | 0.95      | 0.54  | 1.66 | 0.854 |
| DM                         | 1.12      | 0.47  | 2.64 | 0.804 |
| Dyslipidemia               | 1.71      | 0.97  | 3.04 | 0.066 |
| Calcium Channel blocker    | 1.06      | 0.42  | 2.66 | 0.908 |
| Definite spasm             | 1.29      | 0.77  | 2.17 | 0.337 |
| Atherosclerosis $\geq$ 50% | 0.84      | 0.29  | 2.41 | 0.740 |
| Troponin-I                 | 1.02      | 0.99  | 1.06 | 0.209 |
| <b>Antiplatelet agents</b> |           |       |      |       |
| No antiplatelet agent      | reference |       |      |       |
| Aspirin                    | 0.89      | 0.51  | 1.56 | 0.682 |
| Clopidogrel                | 0.54      | 0.13  | 2.28 | 0.399 |
| Aspirin + clopidogrel      | 1.65      | 0.71  | 3.84 | 0.243 |

PCI: percutaneous coronary intervention, HR: Hazard ratio, CI: confidence interval, CHD: Coronary heart disease, DM: diabetes mellitus, primary outcome includes arrhythmia, acute coronary syndrome, and death

Supplementary Figure

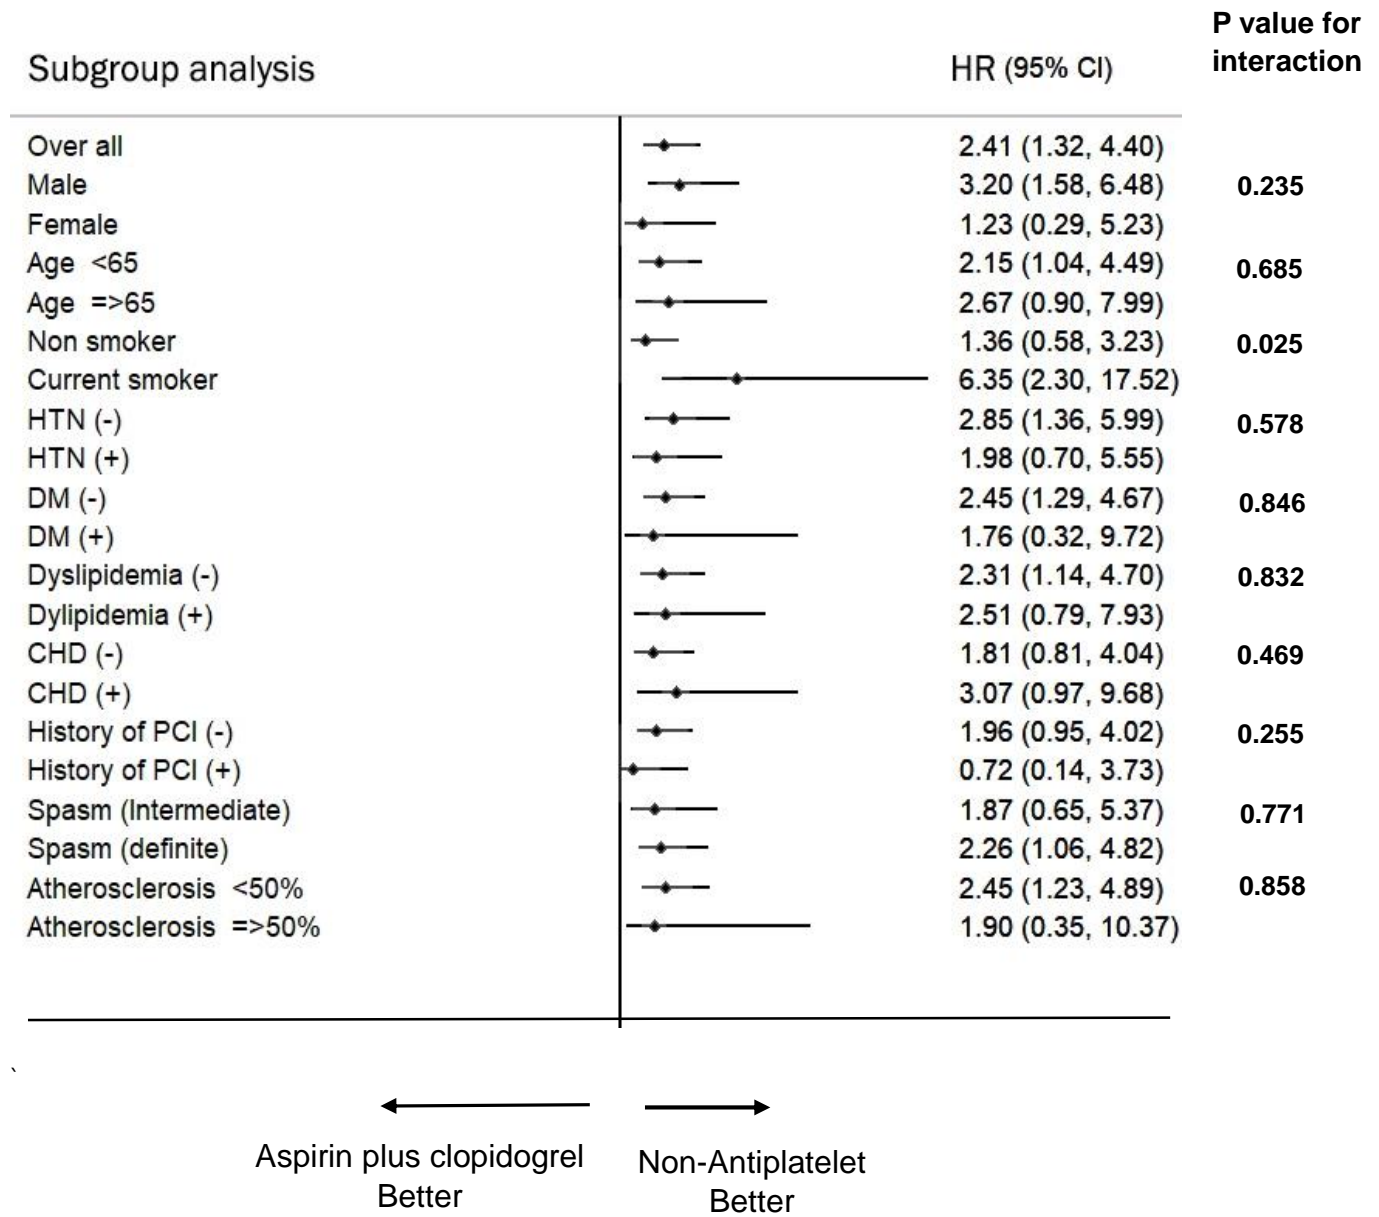

Supplement: 41598_2019_54390_MOESM1_ESM.pdf [file 41598_2019_54390_MOESM1_ESM.pdf]
